# Supplementary material for: Pragmatic language production in mood and psychotic disorders a systematic review and meta-analysis
Source: Research Square preprint supplement (doi:10.21203/rs.3.rs-6839307/v1), 2025-06-11
Supplement: Supplementary file 1 [file 4e4486d52e5918859ebec9eb.docx]

**Supplementary Material:**

**Table S1: Search Strings**

| PubMed | Search: (SSD [Title/Abstract] OR seasonal affective [Title/Abstract] OR dysthymi* [Title/Abstract] OR depress* [Title/Abstract] OR delusion* [Title/Abstract] OR BD [Title/Abstract] OR MDD [Title/Abstract] OR bipolar* [Title/Abstract] OR mania* [Title/Abstract] OR manic [Title/Abstract] OR mood disorder* [Title/Abstract] OR psychoses [Title/Abstract] OR psychosi* [Title/Abstract] OR psychoti* [Title/Abstract] OR schizo* [Title/Abstract] ) AND ((anaphor* [Title/Abstract] OR deix* [Title/Abstract] OR explicature* [Title/Abstract] OR figurative language* [Title/Abstract] OR Grice* [Title/Abstract] OR idiom* [Title/Abstract] OR implicature* [Title/Abstract] OR implicit meaning* [Title/Abstract] OR indirect request* [Title/Abstract] OR intonation* [Title/Abstract] OR ironi* [Title/Abstract] OR irony [Title/Abstract] OR maxims of conversation [Title/Abstract] OR metaphor* [Title/Abstract] OR non literal [Title/Abstract] OR prosod* [Title/Abstract] OR proverb* [Title/Abstract] OR speech act* [Title/Abstract] OR topic model* [Title/Abstract] OR turn tak* [Title/Abstract] ) OR ((language* [Title/Abstract] OR speech* [Title/Abstract] OR linguistic* [Title/Abstract] ) AND (coherence* [Title/Abstract] OR discourse* [Title/Abstract] OR inferen* [Title/Abstract] OR Interrupt* [Title/Abstract] OR paus* [Title/Abstract] OR paus* [Title/Abstract] OR social norm* [Title/Abstract] OR on topic* [Title/Abstract] OR presuppos* [Title/Abstract] OR humor* [Title/Abstract] OR humour* [Title/Abstract] OR pragmatic* [Title/Abstract] OR cohesi* [Title/Abstract] OR disconnect* [Title/Abstract]))) Filters: English |
| --- | --- |
| Scopus | ( TITLE-ABS ( bipolar* OR "seasonal affective" OR dysthymi* OR delusion* OR mania* OR manic OR mdd OR depress* OR "mood disorder*" OR psychoses OR psychosi* OR psychoti* OR schizo* OR ssd OR bd ) ) AND ( TITLE-ABS ( anaphor* OR deix* OR explicature* OR "figurative language*" OR grice* OR idiom* OR implicature* OR "implicit meaning*" OR "indirect request*" OR intonation* OR ironi* OR irony OR "maxims of conversation" OR metaphor* OR "non literal" OR prosod* OR proverb* OR "speech act*" OR "topic model*" OR "turn tak*" ) OR ( TITLE-ABS ( language* OR speech* OR linguistic* ) AND ( TITLE-ABS ( coherence* OR inferen* OR interrupt* OR paus* OR "off topic*" OR "on topic*" OR "social norm*" OR presuppos* OR pragmatic* OR cohesi* OR disconnect* AND discourse* OR humor* OR humour* ) ) ) ) AND ( LIMIT-TO ( DOCTYPE,"ar" ) ) AND ( LIMIT-TO ( LANGUAGE,"English" ) ) |

Notes: * indicates a truncation.

**Table S2: Inclusion/Exclusion Criteria (Disorders)**

| **Inclusions** | **Exclusions** |
| --- | --- |
| Schizophrenia, Brief Psychotic Disorder, Delusional Disorder, First Episode Psychosis, Postpartum Psychosis, Schizoaffective, Schizophreniform | Schizotyped/Schizotypy |
| Major Depressive Disorder, Depression, Postpartum Depression, Seasonal Affective Disorder, dysthymia |  |
| Bipolar Disorder, Manic Depression, |  |

**Table S3: Key Variables and Moderators for the Case-Control Comparisons in the Meta-Analysis**

| **Study**[[1]](#footnote-1) | **Expressive Pragmatic Component**[[2]](#footnote-2) | | **Diagnsotic** | | **n(pts/ctrls)** | **Mean(SDpts)** | | **Mean(SDCTRLS)** | **Effect Size (g)** | | **Standard Error (SE)** | | **Mean age pts** | | **% males pts** | | | **Symptom severity** | **English** | | | **Quality Score** |
| --- | --- | --- | --- | --- | --- | --- | --- | --- | --- | --- | --- | --- | --- | --- | --- | --- | --- | --- | --- | --- | --- | --- |
| Allen & Allen 1985* | Anaphoras (Omitted Referents) | SSD | | 19/9 | | 7.936 (13.824) | 8.04 (13.18) | | | -0.007 | | 0.398 | | 51.16 | | NA | N/A | | | Yes | 9 | |
| Allen & Allen 1985* | Coherence (Connections per Idea) | SSD | | 19/9 | | 1.661 (0.645) | 1.74 (0.36) | | | -0.132 | | 0.398 | | 51.16 | | NA | N/A | | | Yes | 9 | |
| Alonso-Sanchez 2022 | Coherence (Average Similarity of Words in Full picture description) | SSD | | 46/36 | | 0.337 (0.02) | 0.332 (0.02) | | | -0.247 | | 0.223 | | 22 | | 0.77 | 0.367 | | | Yes | 13 | |
| Bambini et al. 2016 | Cooperativity (Interview[[3]](#footnote-3)) | SSD | | 47/35 | | 39.72 (3.21) | 43.6 (1.17) | | | -1.5068 | | 0.2505 | | 39.74 | | 0.62 | 0.263 | | | No | 12 | |
| BenMoshe et al. 2024 | Coherence (Derailment[[4]](#footnote-4)) | SSD | | 23/25 | | 0.225 (0.016) | 0.225 (0.016) | | | 0 | | 0.289 | | 25.46 | | 1 | 0.318 | | | No | 12 | |
| Binz & Brüne 2010 | Cooperativity (Grice’s Maxims pooled) | SSD | | 49/29 | | 1.955 (1.719) | 0.705 (0.887) | | | -0.843 | | 0.243 | | 37.3 | | 0.49 | 0.238 | | | No | 8 | |
| Corcoran et al. 1996* | Cooperativity (Grice’s Maxims Total) | SSD | | 38/13 | | 15.24(2.59) | 18.54(1.1) | | | -1.40 | | 0.35 | | 33.37 | | N/A | N/A | | | Yes | 9 | |
| Despot et al. 2021 | Metaphors (Controlled and semi-controlled pooled) | SSD | | 5/5 | | 0.056 (0.509) | 0.061 (0.529) | | | −0.0087 | | 0.632 | | N/A | | N/A | N/A | | | No | 6 | |
| Elvevåg et al. 2011 | Metaphors | SSD | | 21/21 | | 0.80 (1.5) | 1.23 (2.0) | | | -0.238 | | 0.309 | | 33.52 | | NA | N/A | | | No | 8 | |
| Figueroa-Barra et al. 2022* | Coherence (Mean cosine similarity between question-answer) | SSD | | 49/84 | | 0.767(0.025) | 0.79 (0.021) | | | -0.916 | | 0.19 | | 27.11 | | 0.6 | 0.566 | | | No | 9 | |
| Gargano et al. 2022 | Coherence (Global) | SSD | | 133/133 | | 0.06 (0.47) | 0.0 (0.0) | | | -0.18 | | 0.122 | | 28.93 | | 0.6 | 0.02 | | | No | 7 | |
| Harvey 1983* | Anaphoras (Unclear References and  Ambiguous References pooled) | SSD | | 20/10 | | 0.075 (0.105) | 0.000 (0.014) | | | -0.84 | | 0.402 | | 32.6 | | 0.2 | N/A | | | Yes | 13 | |
| Harvey 1983* | Anaphoras (Idem) | BD | | 20/10 | | 0.058 (0.100) | 0.000 (0.014) | | | -0.681 | | 0.397 | | 30.15 | | 0.3 | N/A | | | Yes | 13 | |
| Harvey 1983* | Coherence (Total Cohesion) | SSD | | 20/10 | | 1.52 (0.485) | 2.08 (0.47) | | | -1.134 | | 0.414 | | 32.6 | | 0.2 | N/A | | | Yes | 13 | |
| Harvey 1983* | Coherence (Idem) | BD | | 20/10 | | 1.619 (0.386) | 2.08 (0.47) | | | -1.082 | | 0.411 | | 30.15 | | 0.3 | N/A | | | Yes | 13 | |
| Hoffman et al. 1986 | Coherence (Total Deviance) | SSD | | 39/40 | | 6.26 (8.95) | 1.57 (3.69) | | | -0.6816 | | 0.231 | | 26.6 | | NA | N/A | | | Yes | 11 | |
| Hoffman et al. 1986 | Coherence (Idem) | BD | | 24/40 | | 12.29 (17.40) | 1.57 (3.69) | | | -0.963 | | 0.271 | | 34.7 | | NA | N/A | | | Yes | 11 | |
| Just et al. 2020* | Coherence(automatically derived coherence metrics) | SSD | | 40/20 | | 0.2713(0.07)[[5]](#footnote-5) | 0.29(0.05)[[6]](#footnote-6) | | | −0.332 | | 0.27 | | 43.8 | | 0.55 | 0.224 | | | No | 12 | |
| Just et al., 2020* | Anaphoras (Ambiguous Referents) | SSD | | 40/20 | | 0.11(0.21)[[7]](#footnote-7) | 0.0145(0.0481)[[8]](#footnote-8) | | | -0.574 | | 0.27 | | 43.8 | | 0.55 | 0.224 | | | No | 12 | |
| Kauschke et al. 2018 | Metaphors | MDD | | 26/32 | | 14.98 (9.79) | 19.83 (14.29) | | | -0.383 | | 0.266 | | 37.26 | | 0.38 | N/A | | | No | 12 | |
| Linscott 2005 | Cooperativity (Grice’s Maxims) | SSD | | 20/26 | | 10.8 (3.9) | 7.2 (0.3) | | | -1.3753 | | 0.33 | | 30.5 | | 0.8 | N/A | | | Yes | 12 | |
| Lundin et al. 2023 | Coherence (Deep Cohesion) | SSD | | 32/15 | | 0.53 (0.85) | 1.05 (0.67) | | | -0.6404 | | 0.319 | | 41.66 | | 0.53 | 0.192 | | | Yes | 10 | |
| Marini et al. 2008 | Coherence (Global Coherence) | SSD | | 29/48 | | 13.667 (13.787) | 0.533 (2.281) | | | -1.509 | | 0.26 | | 28.93 | | 0.6015 | 0.123 | | | No | 8 | |
| Mazza et al. 2008 | Cooperativity (Grice’s Maxims pooled) | SSD | | 38/44 | | 1.672(1.143) | 0.146(0.231) | | | -1.95 | | 0.27 | | 38.5 | | 0.79 | 0.143 | | | No | 8 | |
| Morgan et al. 2021 | Anaphoras (Ambiguous Pronouns pooled) | SSD | | 16/13 | | N/A | N/A | | | -0.164 | | 0.19 | | 24.5 | | 0.81 | N/A | | | Yes | 12 | |
| Morgan et al. 2021 | Coherence (pooled) | SSD | | 16/13 | | N/A | N/A | | | -0.59 | | 0.2 | | 24.5 | | 0.813 | N/A | | | Yes | 12 | |
| Palominos et al., 2023 | Coherence (Number of Recurrences by Words) | SSD | | 20/20 | | 0.052 (0.021) | 0.036 (0.018) | | | -0.801 | | 0.328 | | 35.7 | | 0.6 | 0.593 | | | No | 9 | |
| Parola et al. 2023 CH | Coherence (Second-order Coherence) | SSD ch | | 51/42 | | N/A | N/A | | | -0.2 | | 0.199 | | 27.2 | | 0.78 | 0.254 | | | No | 14 | |
| Parola et al. 2023 DK | Coherence (Idem) | SSD dk | | 111/129 | | N/A | N/A | | | -0.2 | | 0.135 | | 26.9 | | 0.78 | 0.068 | | | No | 14 | |
| Parola et al. 2023 GE | Coherence (Idem) | SSD ge | | 25/29 | | N/A | N/A | | | -0.26 | | 0.284 | | 29.2 | | 0.78 | 0.127 | | | No | 14 | |
| Perlini et al. 2012 | Coherence (Global Coherence) | SSD | | 30/30 | | 9.28 (8.26) | 4.16 (6.00) | | | -0.7 | | 0.265 | | 39.7 | | 0.8 | N/A | | | No | 13 | |
| Perlini et al. 2012 | Coherence (Idem) | BD | | 30/30 | | 7.90 (7.34) | 4.16 (6.00) | | | -0.5507 | | 0.263 | | 44.83 | | 0.37 | N/A | | | No | 13 | |
| Rutter 1985 | Anaphoras (Ambiguous Phoric References) | SSD | | 35/10 | | 6.8 (9.7) | 1.5 (2.3) | | | -0.599 | | 0.364 | | NA | | NA | N/A | | | Yes | 5 | |
| Rutter 1985 | Anaphoras (Idem) | MDD+BD | | 7/10 | | 3.8 (7.0) | 1.5 (2.3) | | | -0.45 | | 0.49 | | NA | | NA | N/A | | | Yes | 5 | |
| Shafiyan et al. 2022 | Metaphors | SSD | | 15/15 | | 1.00 (1.253) | 3.333 (3.244) | | | -0.9232 | | 0.384 | | 47.8 | | 0 | N/A | | | No | 11 | |
| Smirnova et al. 2018 | Metaphors | MDD | | 124/77 | | 2.55 (0.84) | 1.40 (0.83) | | | 1.3701 | | 0.1599 | | 42 | | 0.24 | N/A | | | No | 12 | |
| Tagamets et al., 2014 | Coherence (Personal Thematic Coherence) | SSD | | 11/11 | | 0.817 (.030) | 0.848 (.043) | | | -0.8044 | | 0.443 | | 40 | | 0.82 | N/A | | | Yes | 12 | |

NOTES: n(pts/ctrls)= ratio of clinical to control participants, Mean(SDpts)= Mean and standard deviation for patient population, Mean(SDCTRLS)= Mean and standard deviation for control population, g= Hedges’g, SE=Standard Error.

1. Patient population from studies with an Asterix have been pulled to account for the overall effect of SMIs (e.g. Schizophrenia and First Episode Psychosis were pooled and reported as a single score). [↑](#footnote-ref-1)
2. Expressive ragmatic components have been grouped under the main expressive pragmatic components included in this study. If different, exact wording used by author(s) are included in parenthesis. [↑](#footnote-ref-2)
3. "Discourse production is rated for the presence of communication difficulties at the contextual pragmatic level (e.g., over- or under-informativeness, abrupt topic shift) " [27, p. 108] [↑](#footnote-ref-3)
4. Average pairwise cosine similarity between a word and the 6th following word. [↑](#footnote-ref-4)
5. Raw data provided upon contacting authors: Patients with Formal Thought Disorder: 0.24(0.06), Patients without Formal Thought Disorder: 0 .29(0.08). Patients’ data have been pooled. [↑](#footnote-ref-5)
6. Raw data provided upon contacting authors. [↑](#footnote-ref-6)
7. Raw data provided upon contacting authors: Patients with Formal Thought Disorder: 0.19(0.28), Patients without Formal Thought Disorder: 0 .04(0.09). Patients’ data have been pooled. [↑](#footnote-ref-7)
8. Raw data provided upon contacting authors. [↑](#footnote-ref-8)
